# Supplementary material for: Effects of C60 Fullerene on Thioacetamide-Induced Rat Liver Toxicity and Gut Microbiome Changes
Source: MDPI journal article supplement (doi:10.3390/antiox10060911), 2021-06-04

1. Original images of Western blot used in Figure 4. Protein expression levels of HMGB1 in whole liver homogenates in control, and rats treated with thioacetamide (TAA), thioacetamide + virgin olive oil (TAA+O), thioacetamide + C60 fullerene lower dose (TAA+O+F1), and thioacetamide + C60 fullerene higher dose (TAA+O+F2).

#### HMGB1, whole liver homogenate, X-ray film

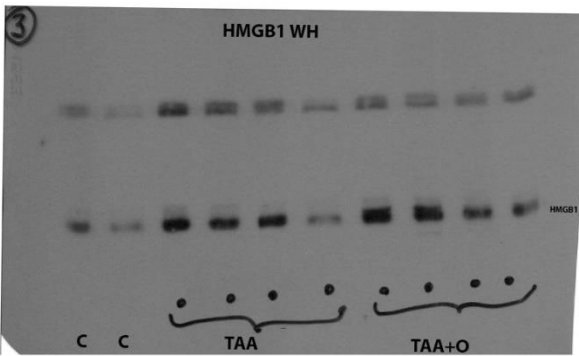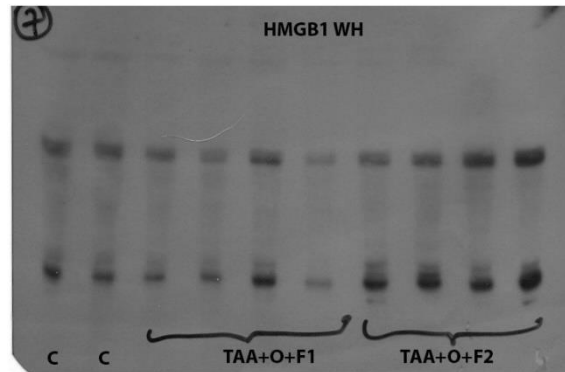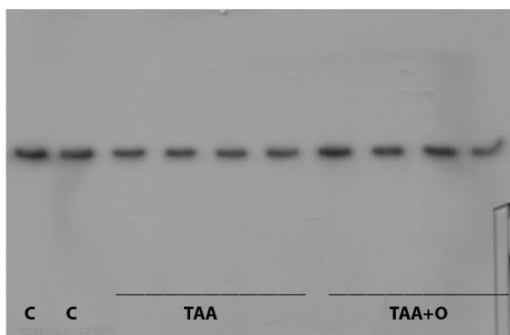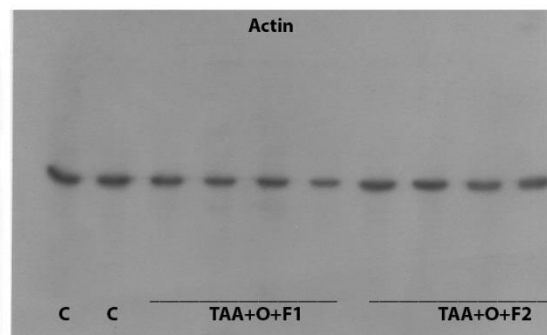

2. Original images of Western blot used in Figure 4. Protein expression levels of phospho-NF-kB p65 in whole liver homogenates in control, and rats treated with thioacetamide (TAA), thioacetamide + virgin olive oil (TAA+O), thioacetamide + C60 fullerene lower dose (TAA+O+F1), and thioacetamide + C60 fullerene higher dose (TAA+O+F2).

**Phospho-NFkB p65, whole liver homogenate, IBright detection**

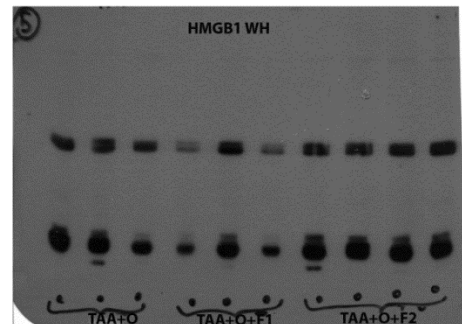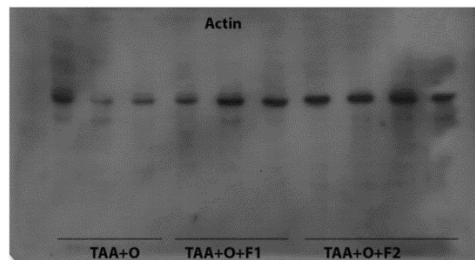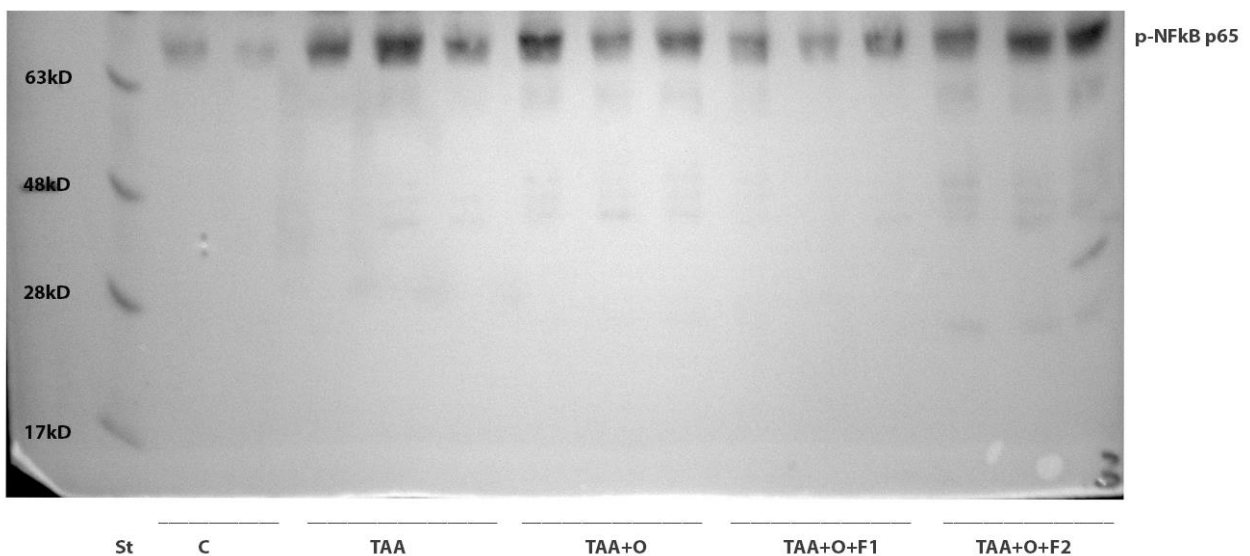

3. Original images of Western blot used in Figure 5A. Protein expression levels of haeme oxygenase-1 (HO-1) in whole liver homogenates in control, and rats treated with thioacetamide (TAA), thioacetamide + virgin olive oil (TAA+O), thioacetamide + C60 fullerene lower dose (TAA+O+F1), and thioacetamide + C60 fullerene higher dose (TAA+O+F2).

**HO-1, whole liver homogenate, IBright detection**

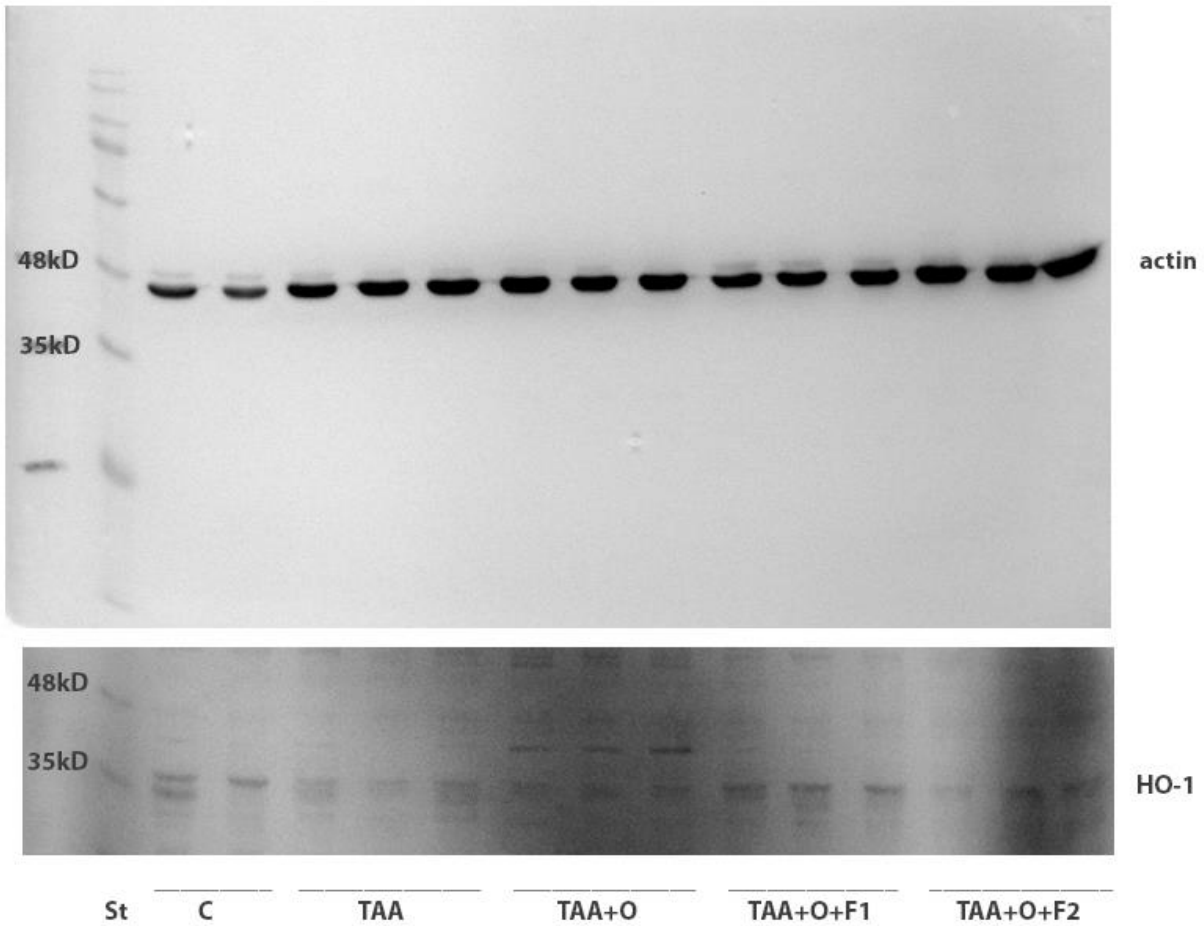

4. Original images of Western blot used in Figure 5A. Protein expression levels of manganese superoxide-dismutase (MnSOD) and copper-zinc superoxide-dismutase (CuZnSOD) in whole liver homogenates in control, and rats treated with thioacetamide (TAA), thioacetamide + virgin olive oil (TAA+O), thioacetamide + C60 fullerene lower dose (TAA+O+F1), and thioacetamide + C60 fullerene higher dose (TAA+O+F2).

**MnSOD, whole liver homogenate, IBright detection**

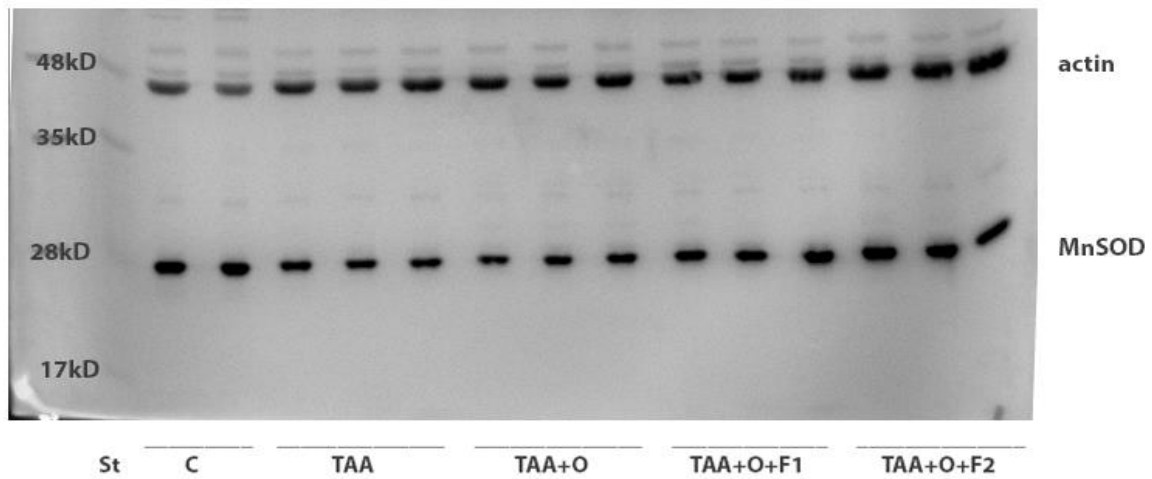

**CuZnSOD, whole liver homogenate, IBright detection**

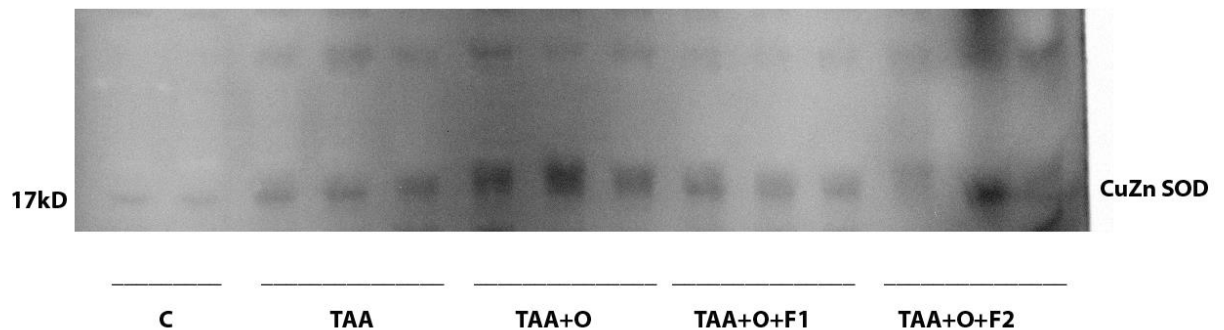

5. Original images of Western blot used in Figure 5B. Protein expression levels of total Nrf2 and NF-kB p65 in nuclear extracts in control, and rats treated with thioacetamide (TAA), thioacetamide + virgin olive oil (TAA+O), thioacetamide + C60 fullerene lower dose (TAA+O+F1), and thioacetamide + C60 fullerene higher dose (TAA+O+F2).

**Total NRF-2 and NF-kB p65 ratio, nuclear liver extracts, IBright detection**

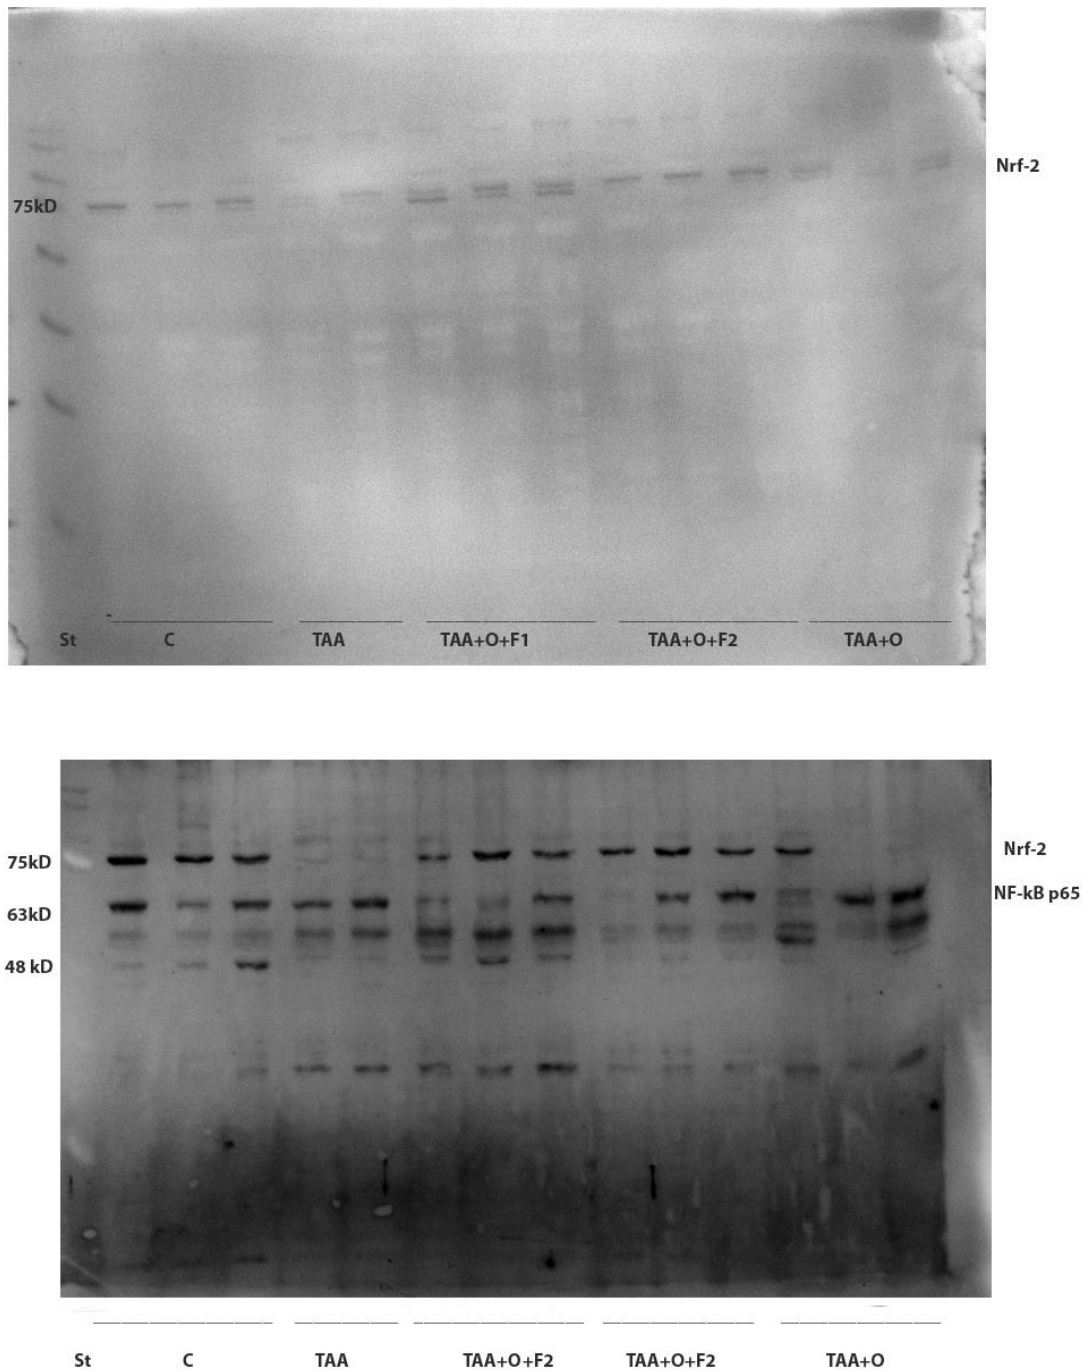

Supplement: s1 [file s1]
